# Supplementary material for: Columnar self-assembly of a 3D-persulfurated coronene asterisk. The dominant role of aryl-sulfur bonds
Source: Royal Society of Chemistry journal article supplement (doi:10.1039/c1nj20472f), 2011-11-17
Supplement: c1nj20472f.pdf [file c1nj20472f.pdf]

## NEW JOURNAL OF CHEMISTRY

### Supporting information

# Columnar Self-Assembly of a 3D-Persulfurated Coronene Asterisk. The Dominant Role of Aryl-Sulfur Bonds.<sup>†</sup>

Peter Kowalzik,<sup>a</sup> Silke Rathgeber,<sup>b</sup> Silvia Karthäuser,<sup>\*a</sup> Rainer Waser,<sup>a</sup> Nicolas Schnaebele,<sup>c</sup> Jean-Manuel Raimundo,<sup>c,d</sup> and Marc Gingras<sup>\*\*c,d</sup>

<sup>a</sup> Peter Grünberg Institut and JARA-FIT, Forschungszentrum Jülich GmbH, 52428 Jülich, Germany. Fax: (+49)2461612550; Tel: (+49)2461614015; E-mail: [s.karthauser@fz-juelich.de](mailto:s.karthauser@fz-juelich.de)

<sup>b</sup> University Koblenz-Landau, Institute for Natural Sciences, 55128 Koblenz, Germany. Fax: (+49)2612872353; Tel: (+49)2612871002353; E-mail: [rathgeber@uni-koblenz.de](mailto:rathgeber@uni-koblenz.de)

<sup>c</sup> Former Address: University of Nice-Sophia-Antipolis, 28 Ave. Valrose, 06103 Nice Cedex 2, France.

<sup>d</sup> CNRS, Aix-Marseille University, UPR 3118 CINAM, 13288 Marseille Cedex 09, France. Fax: (+33) 491829155; Tel: (+33) 491829155; E-mail: [marc.gingras@univmed.fr](mailto:marc.gingras@univmed.fr)

### Surface morphology of DPTC on HOPG(0001)

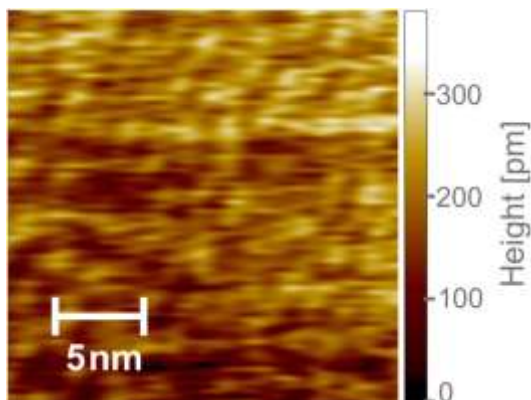

**Figure S1.** STM constant current image ( $V = 1.1$  V,  $I = 0.17$  nA) obtained for the monolayer DPTC covered HOPG(0001) surface at a temperature  $T = 77$  K. Molecular motions are reduced in comparison to measurements at room temperature. In the latter case, no structural resolution is obtained. At  $T = 77$  K, the STM image shows a monolayer with features of single molecules.

### Tunneling spectroscopy of DPTC on HOPG(0001)

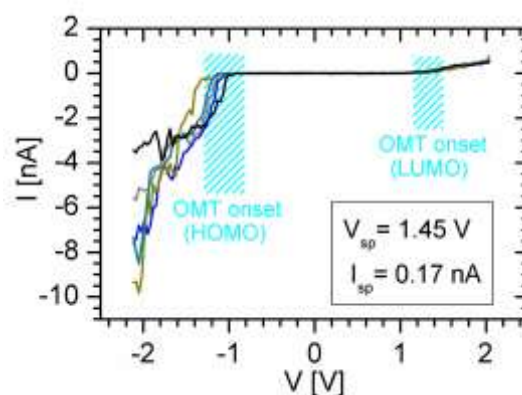

**Figure S2.** A set of single  $I(V)$  traces obtained on the DPTC covered HOPG(0001) surface at  $T = 77$  K. Each curve was recorded with the tunneling set point values  $V_{sp} = 1.45$  V and  $I_{sp} = 0.17$  nA. The curves exemplify that a determination of the onset of the orbital mediated tunneling (OMT) is not possible without ambiguity. The measured HOMO-LUMO gap varies in a range of  $\pm 0.2$  eV around the mean value  $\Delta E_{STS} \approx 2.3$  eV. These variations are believed to originate from the disordered nature of the DPTC layer as well as from residual molecular motions even at  $T = 77^\circ$ .

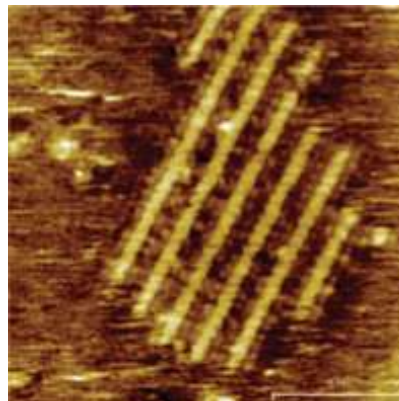

**Figure S3.** STM constant current topographic image of a DPTC monolayer on Au(111) at room temperature showing an ordered columnar structure.

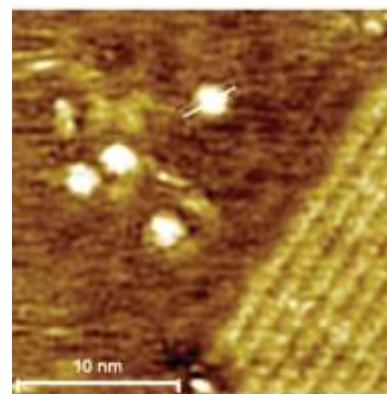

**Figure S4a.** STM constant current topographic image of a DPTC monolayer on Au(111) at room temperature. Some bright spots of nearly identical size corresponding to single DPTC molecules adsorbed on the monolayer are observed.

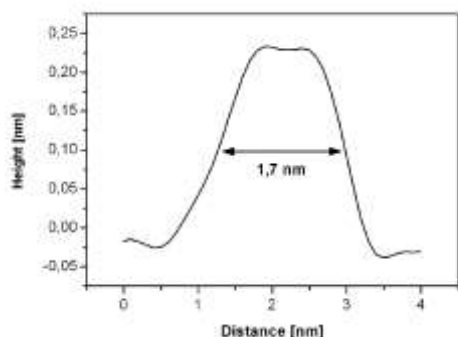

**Figure S4b.** Line scan across one DPTC molecule showing an apparent diameter of approximately 1.7 nm. Assuming a disc-like shape, the apparent cross-section corresponds to 2.27 nm<sup>2</sup>. However, in STM measurements the diameter represents the molecular orbital distribution and not the “real” molecular size.

### X-ray photoelectron spectroscopy (XPS) data of the DPTC monolayer on Au(111)

XPS measurements of the DPTC monolayer on Au(111) (see Figure S3) were carried out to gain insight into the molecule-substrate interactions. The measurements were carried out on a XPS 5600 system (Physical Electronics, USA) with a Mg-*ka* X-ray source (13 kV, 300 W). The pass energy of the analyzer was set to 11.75 eV. The binding energies were corrected using the Au(4f<sub>7/2</sub>) peak energy (84.0 eV) as an energy standard.

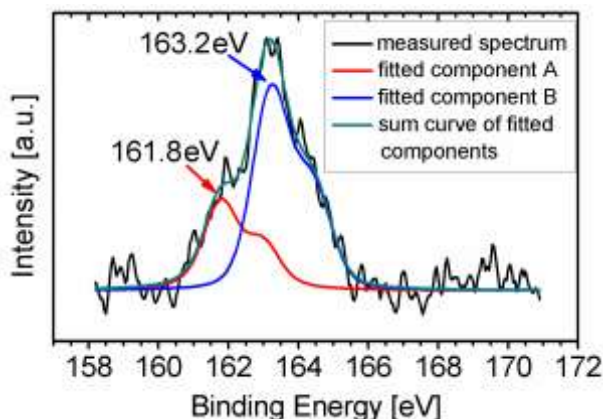

**Figure S5.** XPS core level spectrum in the S 2p region of a DPTC monolayer on Au(111). Each sulfur 2p component consists of a S 2p<sub>1/2</sub> / S 2p<sub>3/2</sub> doublet with an intensity ratio of 1:2.<sup>1</sup> Two S 2p<sub>3/2</sub> peaks are observed at binding energies of 161.8 and 163.2 eV, respectively. The main peak at 163.2 eV corresponds to unbound sulfur atoms of the thioether groups of DPTC. The peak at 161.8 eV can be correlated to a smaller fraction of sulfur atoms of DPTC bound to the gold surface.<sup>2</sup> Thus, most likely some thioether groups of the DPTC molecules oriented in “edge-on” configuration from a linkage with the surface gold atoms. The fraction of the sample surface covered with the ordered columnar structure is only around 10% and the molecules in the disordered regions may have a different and varying number of S-Au bonds. Consequently, the intensity ratio of the 163.2 and 161.8 eV peak does not correlate directly to the number of S-Au bonds formed by a single “edge-on” DPTC within the columns.

### Fluorescence Correlation Spectroscopy

The intensity correlation function was determined by cross correlating the signal originating from the same sample volume but detected in two detectors via a software correlator using a multiple tau algorithm.<sup>3</sup> In this way the artificial contribution to the signal from detector after pulsing can be suppressed. A 1nM Rhodamine 6G (Rh6G, Aldrich) dimethylformamide (DMF) solution was used as reference for which the diffusion coefficient was determined to be  $D_{DMF}^{Rh6G} = (4.2 \pm 0.2) \times 10^{-10} \text{ m}^2/\text{s}$  at  $T=20^\circ\text{C}$ .

$D_{DMF}^{Rh6G}$  was derived using the relationship  $D_{DMF} = D_{H_2O} \eta_{H_2O} / \eta_{DMF}$ , where  $D_{H_2O}^{Rh6G} = (3.8 \pm 0.2) \times 10^{-10} \text{ m}^2/\text{s}$  denotes the diffusion coefficient of Rh6G in water,  $\eta_{H_2O} = 1.003 \text{ Pas}$  and  $\eta_{DMF} = 0.9189 \text{ Pas}$  are the viscosities of water and DMF, respectively.<sup>4</sup> The reference measurement yields for the lateral focus dimension  $w_{xy} = (262 \pm 12) \text{ nm}$ . The fit is insensitive to the vertical focus dimension and the measured correlation functions  $G(t)$  measured for Rh6G as well as for the DPTC solutions are sufficiently described by the approximate relation,

$$G(t) = \frac{1}{\bar{N}} \left( 1 + \frac{4}{w_{xy}^2} Dt \right)^{-1} + 1 \quad (S1)$$

where  $\bar{N}$  is the average number of labeled molecules in the focus,  $D$  their diffusion coefficient and  $t$  the lag time. For more details see Ref. (4) and (5).

The hydrodynamic radius  $R_h$  of the DPTC molecule can be derived from the measured diffusion coefficients using the Stokes-Einstein relation,

$$D_0 = \frac{k_B T}{6\pi\eta_{DMF} R_h} \quad (S2)$$

where  $D_0$  is the diffusion coefficient in the limit of zero concentration,  $T$  is the temperature (here  $T=20^\circ\text{C}$ ),  $\eta_{DMF} = 0.9189 \text{ Pas}$  is the viscosity of DMF, and  $k_B$  is the Boltzmann constant. By averaging the diffusion coefficients measured for samples with different DPTC concentrations we obtain  $\bar{D}_0 = (3.2 \pm 0.2) \text{ m}^2/\text{s}$ , yielding  $R_h = (0.72 \pm 0.04) \text{ nm}$  for the hydrodynamic radius. Note, that the error given for the values of  $\bar{D}_0$  and  $R_h$  include systematic errors (around 6%) originating from measuring against a standard for the determination of the illumination profile which is assumed to be Gaussian. The standard deviation resulting from fitting the data are significantly smaller,  $\Delta\bar{D}_0 = 0.02 \text{ m}^2/\text{s}$  and  $\Delta\bar{R}_h = 0.006 \text{ nm}$ , respectively.

### References:

- (1) J. Noh, Y. Jeong, E. Ito, M. Hara, *J. Phys. Chem. C*, 2007, **111**, 2691-2695.
- (2) T. Ishida, N. Choi, W. Mizutani, H. Tokumoto, I. Kojima, H. Azebara, H. Hokari, U. Akiba, M. Fujihira, *Langmuir*, 1999, **15**, 6799-6806.
- (3) K. Weisshart, V. Jüngel, S. J. Briddon, *Curr. Pharmaceut. Biotechnol.*, 2004, **5**, 135-154.
- (4) S. Rathgeber, H.-J. Beauvisage, H. Chevreau, N. Willenbacher, C. Oelschlaeger, *Langmuir*, 2009, **25**, 6368-6376.
- (5) O. Krichevsky, G. Bonnet, *Rep. Prog. Phys.*, 2002, **65**, 251-297.
